# Supplementary material for: Mortality, Morbidity and Health-Related Outcomes in Informal Caregivers Compared to Non-Caregivers: A Systematic Review
Source: MDPI journal article supplement (doi:10.3390/ijerph19105864), 2022-05-11
Supplement: s1 [file s1]

### Supplement: Search Strategy

**Table S1**

| Database          | Search terms                                                                                                                                                                                                                                                                                                                                                     | Results                                                                                                                                                                                                              | Filters                                         |
|-------------------|------------------------------------------------------------------------------------------------------------------------------------------------------------------------------------------------------------------------------------------------------------------------------------------------------------------------------------------------------------------|----------------------------------------------------------------------------------------------------------------------------------------------------------------------------------------------------------------------|-------------------------------------------------|
| 1. PubMed         | #1: ("Home Nursing"[Mesh])                                                                                                                                                                                                                                                                                                                                       | 1,259                                                                                                                                                                                                                | Filters: last 10 years                          |
| 2. CINAHL         | #1: (MH "Home Nursing")                                                                                                                                                                                                                                                                                                                                          | 1,448                                                                                                                                                                                                                | Limiters - Published Date:<br>20090101-20201231 |
| 3. Web of Science | <p>#1: TS=<br/> ("informal caregiver*" OR "home nursing" OR "nursing relatives" OR "caring relatives" OR "caregiving relatives" OR "family caregivers")</p> <p>#2: TS=<br/> (disease* OR illness OR burden OR strain OR health OR satisfaction OR "quality of life" OR effect)</p> <p>#3: TS= (intervention OR child* OR palliative)</p> <p>#1 AND #2 NOT #3</p> | <p>3,175<br/>1,062<br/>3<br/>27<br/>18<br/>6,714</p> <p>5,424,140<br/>298,207<br/>207,941<br/>1,132,492<br/>2,178,751<br/>161,166<br/>273,397<br/>6,165,277</p> <p>685,689<br/>1,108,097<br/>44,990</p> <p>2,824</p> | Filters: last 10 years                          |

Conducted by P.J.
